# Supplementary material for: Ligand effect on Ru-centered species toward methane activation
Source: Royal Society of Chemistry journal article supplement (doi:10.1039/d4cp01420k), 2024-01-01
Supplement: d4cp01420k1.pdf [file d4cp01420k1.pdf]

# Supporting Information

## Ligand effect on Ru-centered species toward methane activation

*Mengdi Guo,<sup>ab</sup> Xiaonan Wu,<sup>\*c</sup> Hechen Wu<sup>d</sup> and Xiaoyan Sun<sup>\*ab</sup>*

<sup>a</sup> Qingdao Institute of Bioenergy and Bioprocess Technology, Chinese Academy of Sciences, 266101 Qingdao (P. R. China).

<sup>b</sup> Shandong Energy Institute, 266101 Qingdao (P. R. China).

<sup>c</sup> East China Normal University, 200241 Shanghai (P. R. China)

<sup>d</sup> Fudan University, 200240 Shanghai (P. R. China).

Xiaonan Wu\*: E-mail: [xnwu@chem.ecnu.edu.cn](mailto:xnwu@chem.ecnu.edu.cn)

Xiaoyan Sun\*: E-mail: [sunxy@qibebt.ac.cn](mailto:sunxy@qibebt.ac.cn)

# Contents

## 1. Experimental and theoretical results

**Fig. S1** (A) Mass spectra of  $\text{Ru}_3(\text{CO})_{12}$  dissolved in  $\text{CH}_3\text{CN}$  without and with source fragmentation. (B) Collision reduced dissociation process of  $[\text{RuCH}(\text{CNH})_2(\text{CH}_3\text{CN})_2\text{CO}]^+$ . (C) A possible model of the geometry of  $[\text{RuCH}(\text{CNH})_2(\text{CH}_3\text{CN})_2\text{CO}]^+$ . (Page S3)

**Fig. S2** Reactions of  $[\text{RuCH}]^+$  and  $[\text{RuCHCNH}]^+$  with  $\text{CD}_4$ . (Page S4)

**Fig. S3** Reactions of monoisotopic  $[\text{RuCH}]^+$  with  $\text{CH}_4$ . (Page S4)

**Fig. S4** Reactions of monoisotopic  $[\text{RuCHCNH}]^+$  with  $\text{CH}_4$ . (Page S5)

**Fig. S5** Reaction of  $[\text{RuCHCH}_2]^+$  and  $[\text{RuCHCNHCH}_2]^+$  with  $\text{CH}_4$  and  $\text{CD}_4$ . (Page S6)

**Fig. S6** Reaction of monoisotopic  $[\text{RuCHCNHCH}_2]^+$  with  $\text{CH}_4$ . (Page S6)

**Fig. S7** Collision induced dissociation of products  $[\text{RuCHCH}_2]^+$  and  $[\text{RuCDCD}_2]^+$ . (Page S7)

**Fig. S8** Collision induced dissociation of products  $[\text{RuCHCNHCH}_2]^+$  and  $[\text{RuCHCNHCD}_2]^+$ . (Page S7)

**Fig. S9** Collision induced dissociation of monoisotopic products  $[\text{RuCHCNHCH}_2]^+$  and  $[\text{RuCHCND}_2]^+$ /  $[\text{RuCDCNHCD}_2]^+$ . (Page S8)

**Fig. S10** CID processes of monoisotopic  $[\text{RuCHCNH}]^+$ . (Page S8)

**Fig. S11** Stable structures of  $[\text{RuC}]^+$ ,  $[\text{RuCH}]^+$ ,  $[\text{RuCNH}]^+$  and  $[\text{RuCHCNH}]^+$ . (Page S9)

**Fig. S12** PES toward the reactions of  $^{12}\text{C}$ - $^{13}\text{C}$  exchange of  $[\text{RuCH}]^+/\text{CH}_4$  (blue line) and  $[\text{RuCHCNH}]^+/\text{CH}_4$  (red line). Calculations are carried out at PBE0/def2-QZVPP//PBE0/def2-TZVPP level. Energies are in kJ/mol. (Page S9)

**Fig. S13** PES toward the reactions of  $[\text{RuC}]^+$  (a),  $[\text{RuCH}]^+$  (b),  $[\text{RuCNH}]^+$  (c) and  $[\text{RuCHCNH}]^+$  (d-e) with  $\text{CH}_4$ . (Page S10)

**Fig. S14** PES toward the reaction of  $[\text{RuNCCH}_2]^+$  with  $\text{CH}_4$ . (Page S11)

**Fig. S15** PES toward the reaction of  $[\text{RuNCCH}_2]^+$  with  $\text{H}_2\text{O}$  and structural transformation between  $[\text{RuNCCH}_2]^+$  and  $[\text{RuCHCNH}]^+$ . (Page S12)

**Fig. S16** PES toward the reactions of  $[\text{RuC}]^+$  with  $\text{CH}_4$ . (Page S13)

**Fig. S17** PES for the reaction of  $[\text{RuCH}]^+$  with  $\text{CH}_4$  toward product P. (Page S14)

**Fig. S18** PES for the reaction of  $[\text{RuCH}]^+$  with  $\text{CH}_4$  toward product P\*. (Page S14)

**Fig. S19** PES for the reaction of  $[\text{RuCH}]^+$  with  $\text{CH}_4$  toward product P\*\*. (Page S15)

**Fig. S20** PES toward the reactions of  $[\text{RuCNH}]^+$  with  $\text{CH}_4$ . (Page S15)

**Fig. S21** PES for the reaction of  $[\text{RuCHCNH}]^+$  with  $\text{CH}_4$  toward product P1 and P2. (Page S16)

**Fig. S22** PES for the reaction of  $[\text{RuCHCNH}]^+$  with  $\text{CH}_4$  toward product P2. (Page S18)

**Fig. S23** PES for the reaction of  $[\text{RuCHCNH}]^+$  with  $\text{CH}_4$  toward product P<sup>\*\*</sup>. (Page S19)

**Fig. S24** Charge and spin populations on the transferring hydrogen of H involved transition states of  $[\text{RuCH}]^+$  and  $[\text{RuCHCNH}]^+$ . (Page S20)

**Fig. S25** Composition and occupancy of HOMOs of (a)  $[\text{RuL}]^+$  (R), (b)  $[\text{RuL}]^+/\text{CH}_4$  (I1) and transition states involved in the (c) first and (d) second rounds of hydrogen transfer. (Page S20)

**Fig. S26** HOMOs (bottom) and LUMOs (top) of  $[\text{RuL}]^+$  and  $\text{CH}_4$ . (Page S22)

**Fig. S27** Natural bond orbital (NBO) analysis of  $[\text{RuL}]^+/\text{CH}_4$ . (Page S22)

## 2. References

Page S23

# 1. Experimental and theoretical results

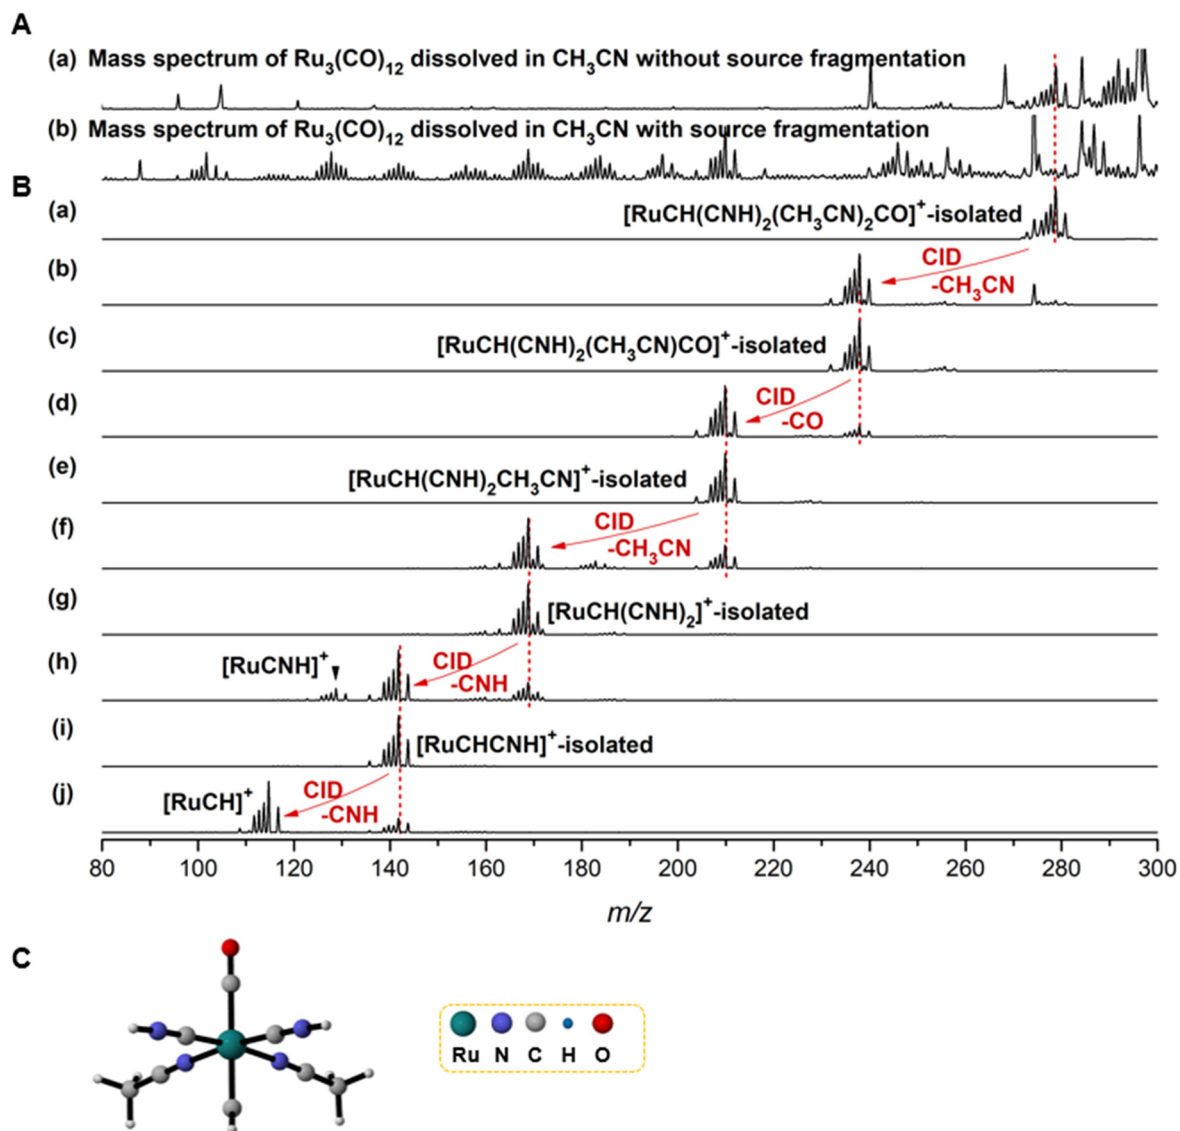

**Fig. S1** (A) Mass spectra of  $\text{Ru}_3(\text{CO})_{12}$  dissolved in  $\text{CH}_3\text{CN}$  without and with source fragmentation. (B) Collision reduced dissociation process of  $[\text{RuCH}(\text{CNH})_2(\text{CH}_3\text{CN})_2\text{CO}]^+$ . (C) A possible model of the geometry of  $[\text{RuCH}(\text{CNH})_2(\text{CH}_3\text{CN})_2\text{CO}]^+$  built according to the CID process in Fig. S1B.

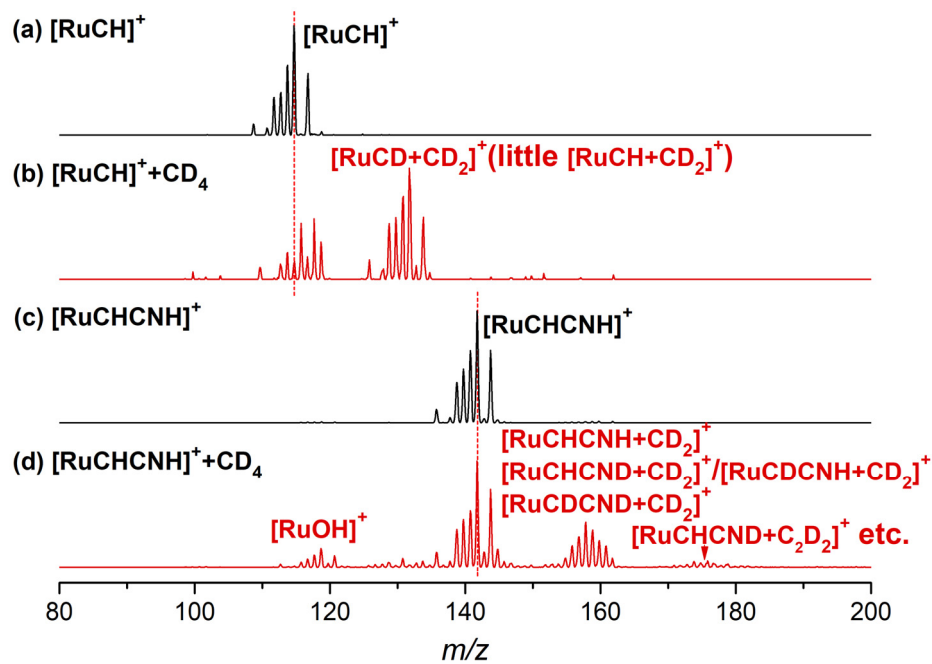

Fig. S2 Reactions of  $[\text{RuCH}]^+$  and  $[\text{RuCHCNH}]^+$  with  $\text{CD}_4$ .

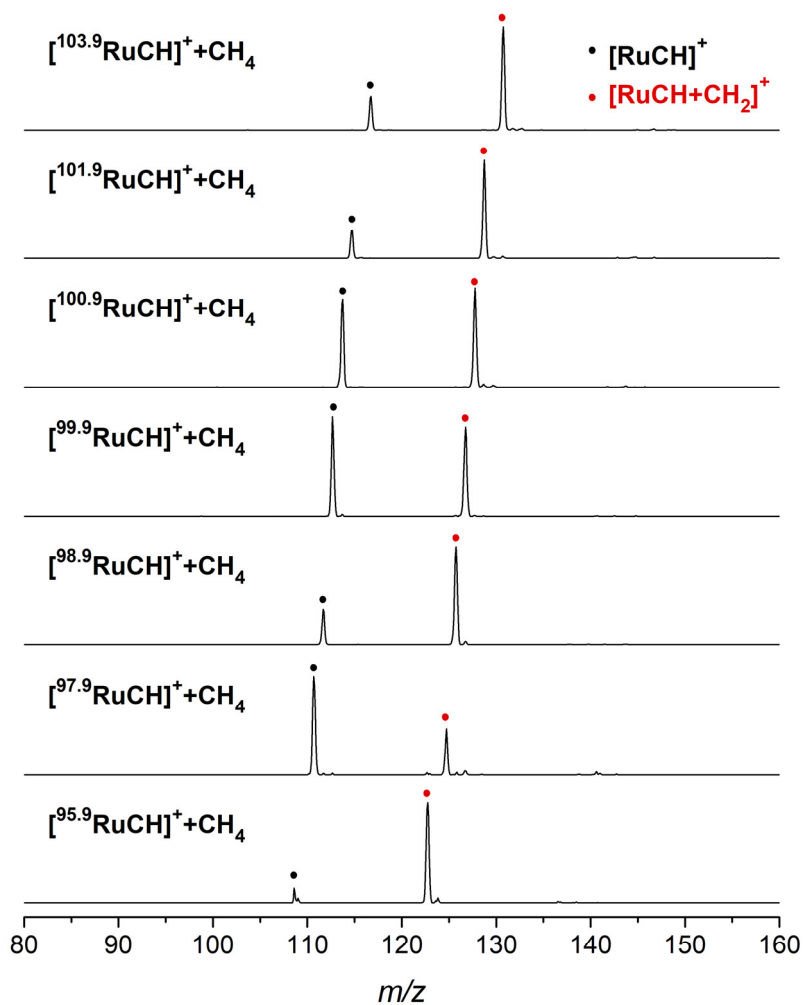

Fig. S3 Reactions of monoisotopic  $[\text{RuCH}]^+$  with  $\text{CH}_4$ .

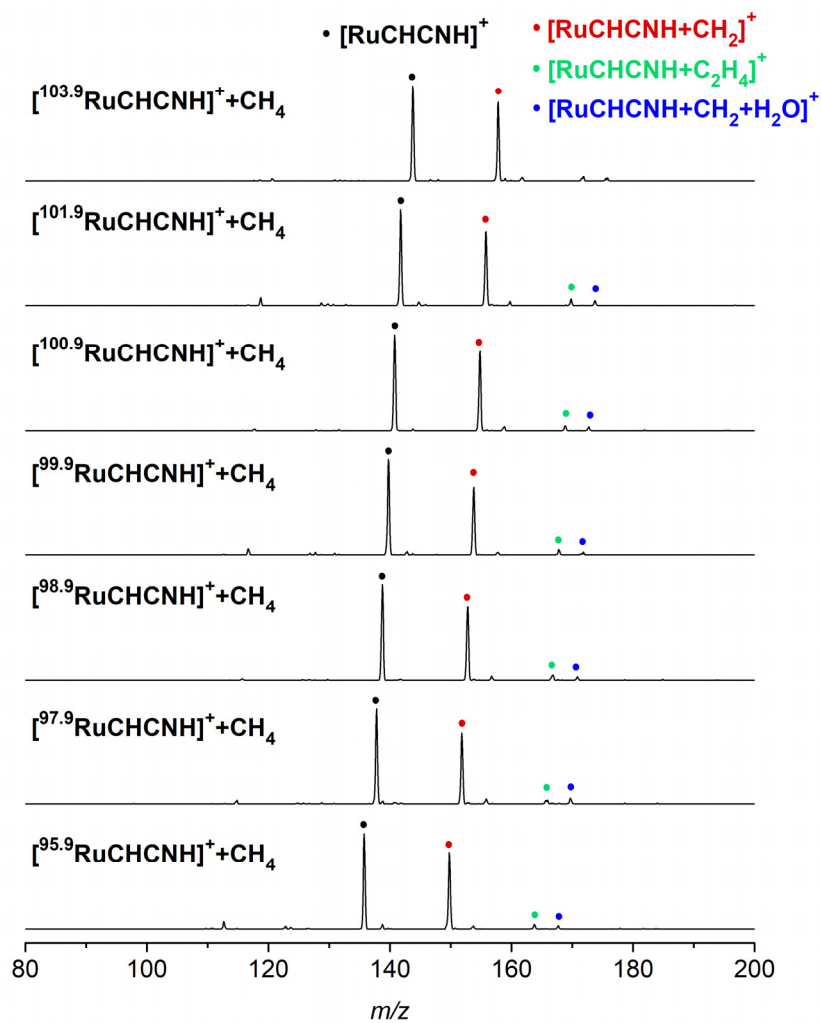

**Fig. S4** Reactions of monoisotopic [RuCHCNH]<sup>+</sup> with CH<sub>4</sub>.

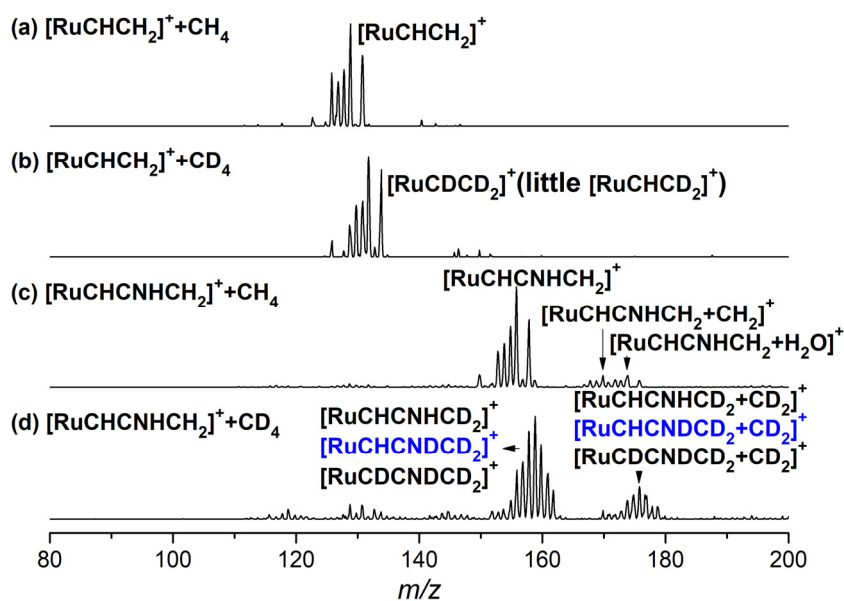

**Fig. S5** Reaction of  $[\text{RuCHCH}_2]^+$  and  $[\text{RuCHCNHCH}_2]^+$  with  $\text{CH}_4$  and  $\text{CD}_4$ . Blue formulas could also be  $[\text{RuCDCNHCD}_2]^+$  and  $[\text{RuCDCNHCD}_2+\text{CD}_2]^+$ .

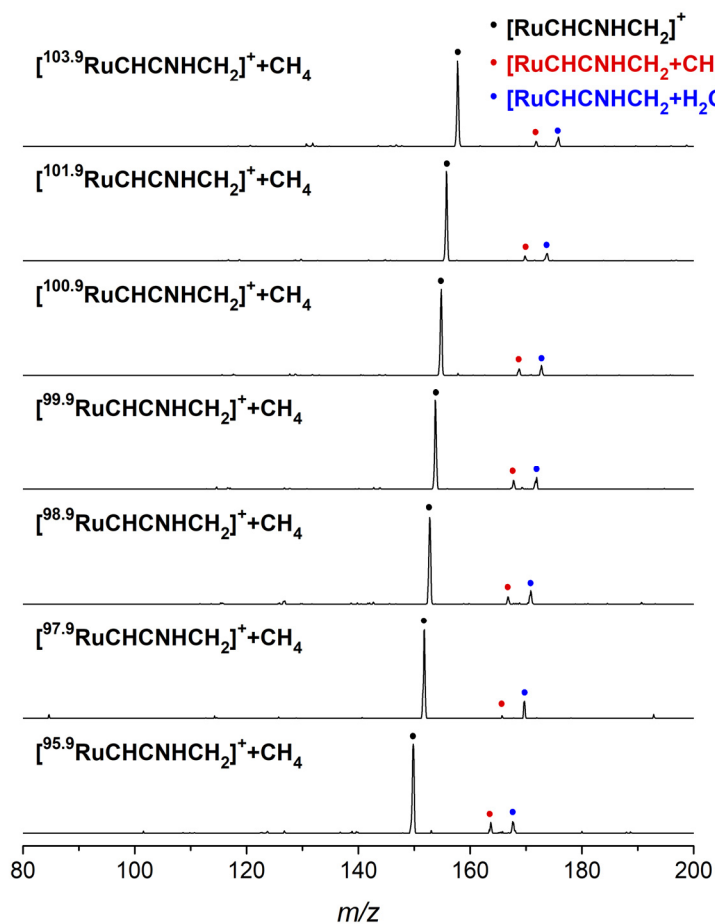

**Fig. S6** Reaction of monoisotopic  $[\text{RuCHCNHCH}_2]^+$  with  $\text{CH}_4$ .

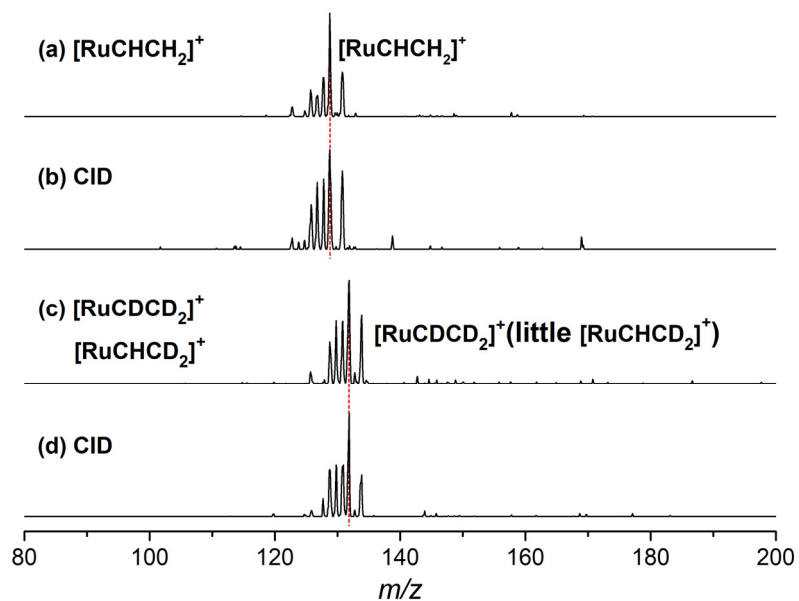

**Fig. S7** Collision induced dissociation of products  $[\text{RuCHCH}_2]^+$  and  $[\text{RuCDCD}_2]^+$ .

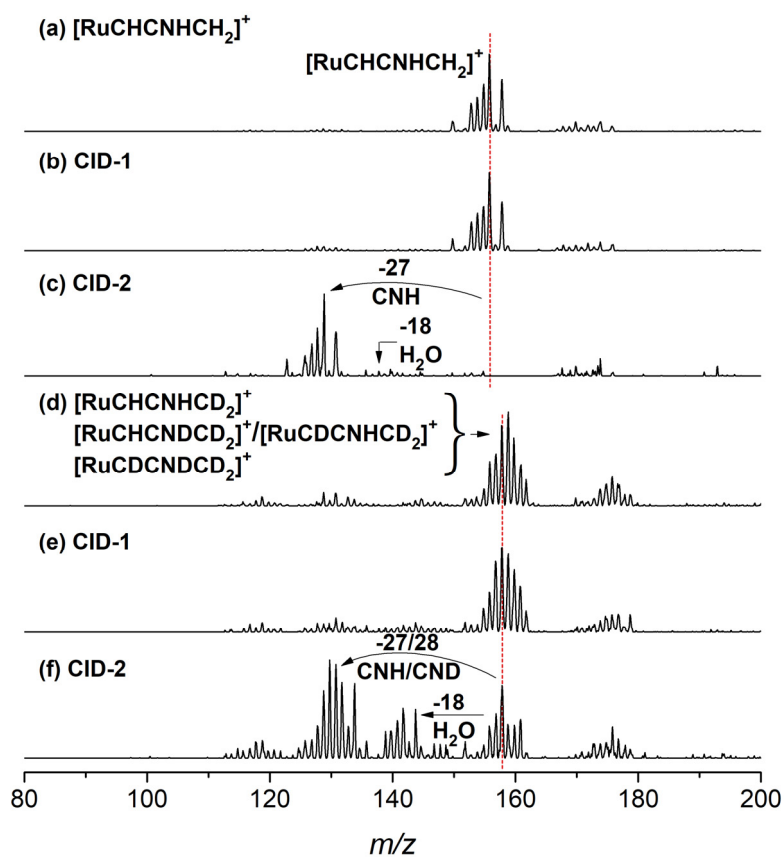

**Fig. S8** Collision induced dissociation of products  $[\text{RuCHCNHCH}_2]^+$  and  $[\text{RuCHCNHCD}_2]^+$ .

The intensity of water loss in collision induced dissociation of products  $[\text{RuCHCNHCH}_2]^+$  on the mass spectra is affected by the background water and relatively intensity of CNH loss peak. Water loss is more clearly shown in Fig. S9.



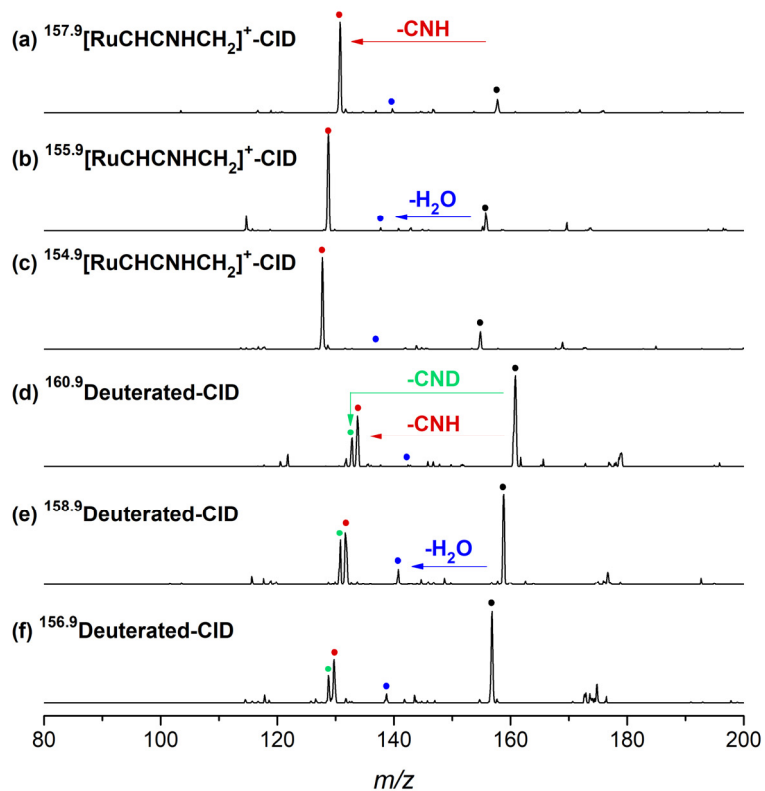

**Fig. S9** Collision induced dissociation of monoisotopic products  $[\text{RuCHCNHCH}_2]^+$  and  $[\text{RuCHCNDCD}_2]^+ / [\text{RuCDCNHCD}_2]^+$ .

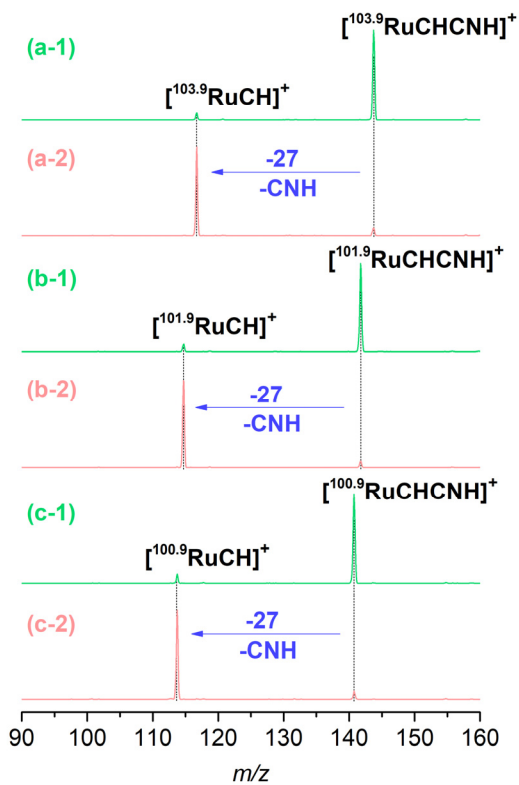

**Fig. S10** CID of monoisotopic  $[\text{RuCHCNH}]^+$  (green: low collision energy, pink: high collision energy).

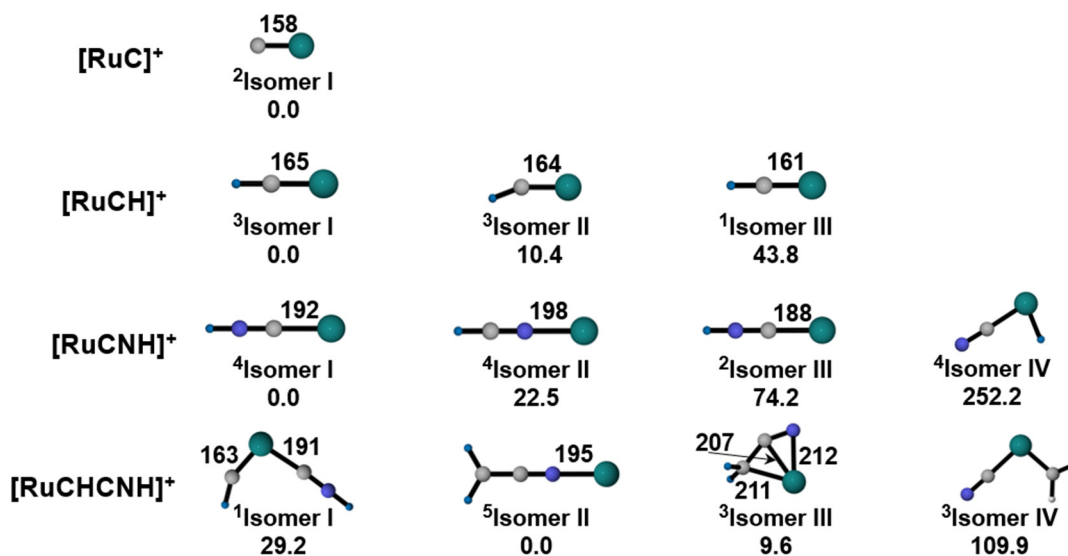

**Fig. S11** Stable structures of [RuC]<sup>+</sup>, [RuCH]<sup>+</sup>, [RuCNH]<sup>+</sup> and [RuCHCNH]<sup>+</sup>. Energies and bond length are in kJ/mol and pm.

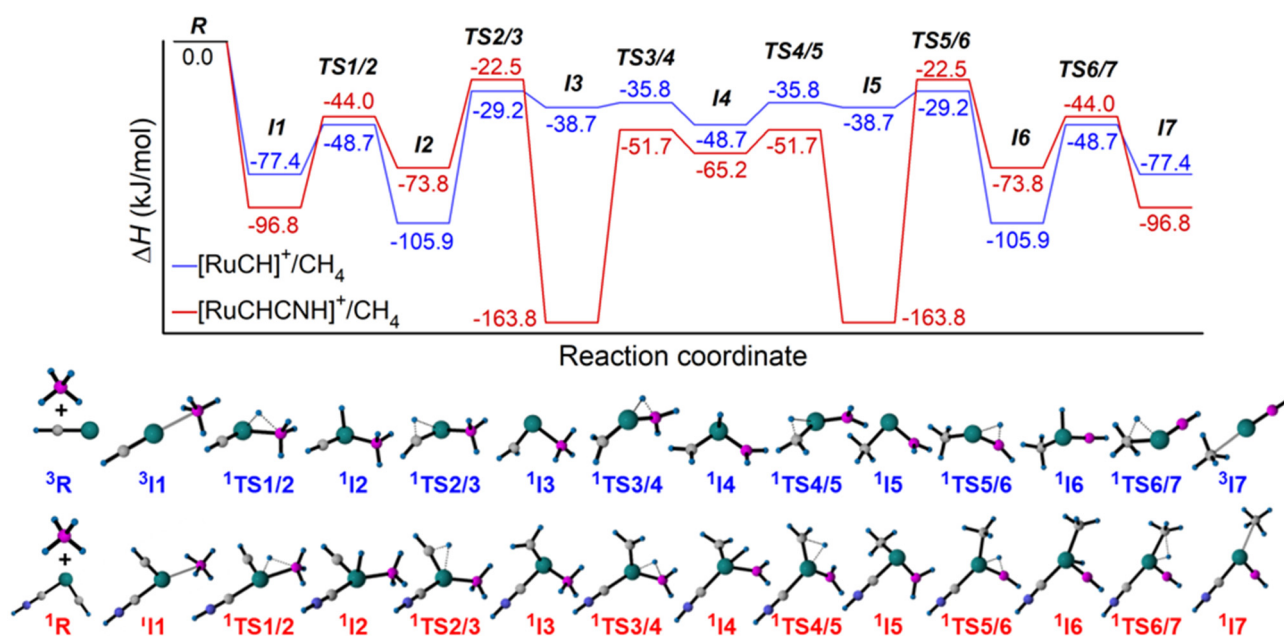

**Fig. S12** PES toward the reactions of <sup>12</sup>C-<sup>13</sup>C exchange of [RuCH]<sup>+</sup>/CH<sub>4</sub> (blue line) and [RuCHCNH]<sup>+</sup>/CH<sub>4</sub> (red line). Calculations are carried out at PBE0/def2-QZVPP//PBE0/def2-TZVPP level. Energies are in kJ/mol.

As shown in Fig. S12, <sup>12</sup>C/<sup>13</sup>C exchange in [RuCH]<sup>+</sup>/CH<sub>4</sub> system is spontaneous and mild process, conforming the feasibility of <sup>12</sup>C/<sup>13</sup>C exchange occurring before CH<sub>4</sub> activation without CID.

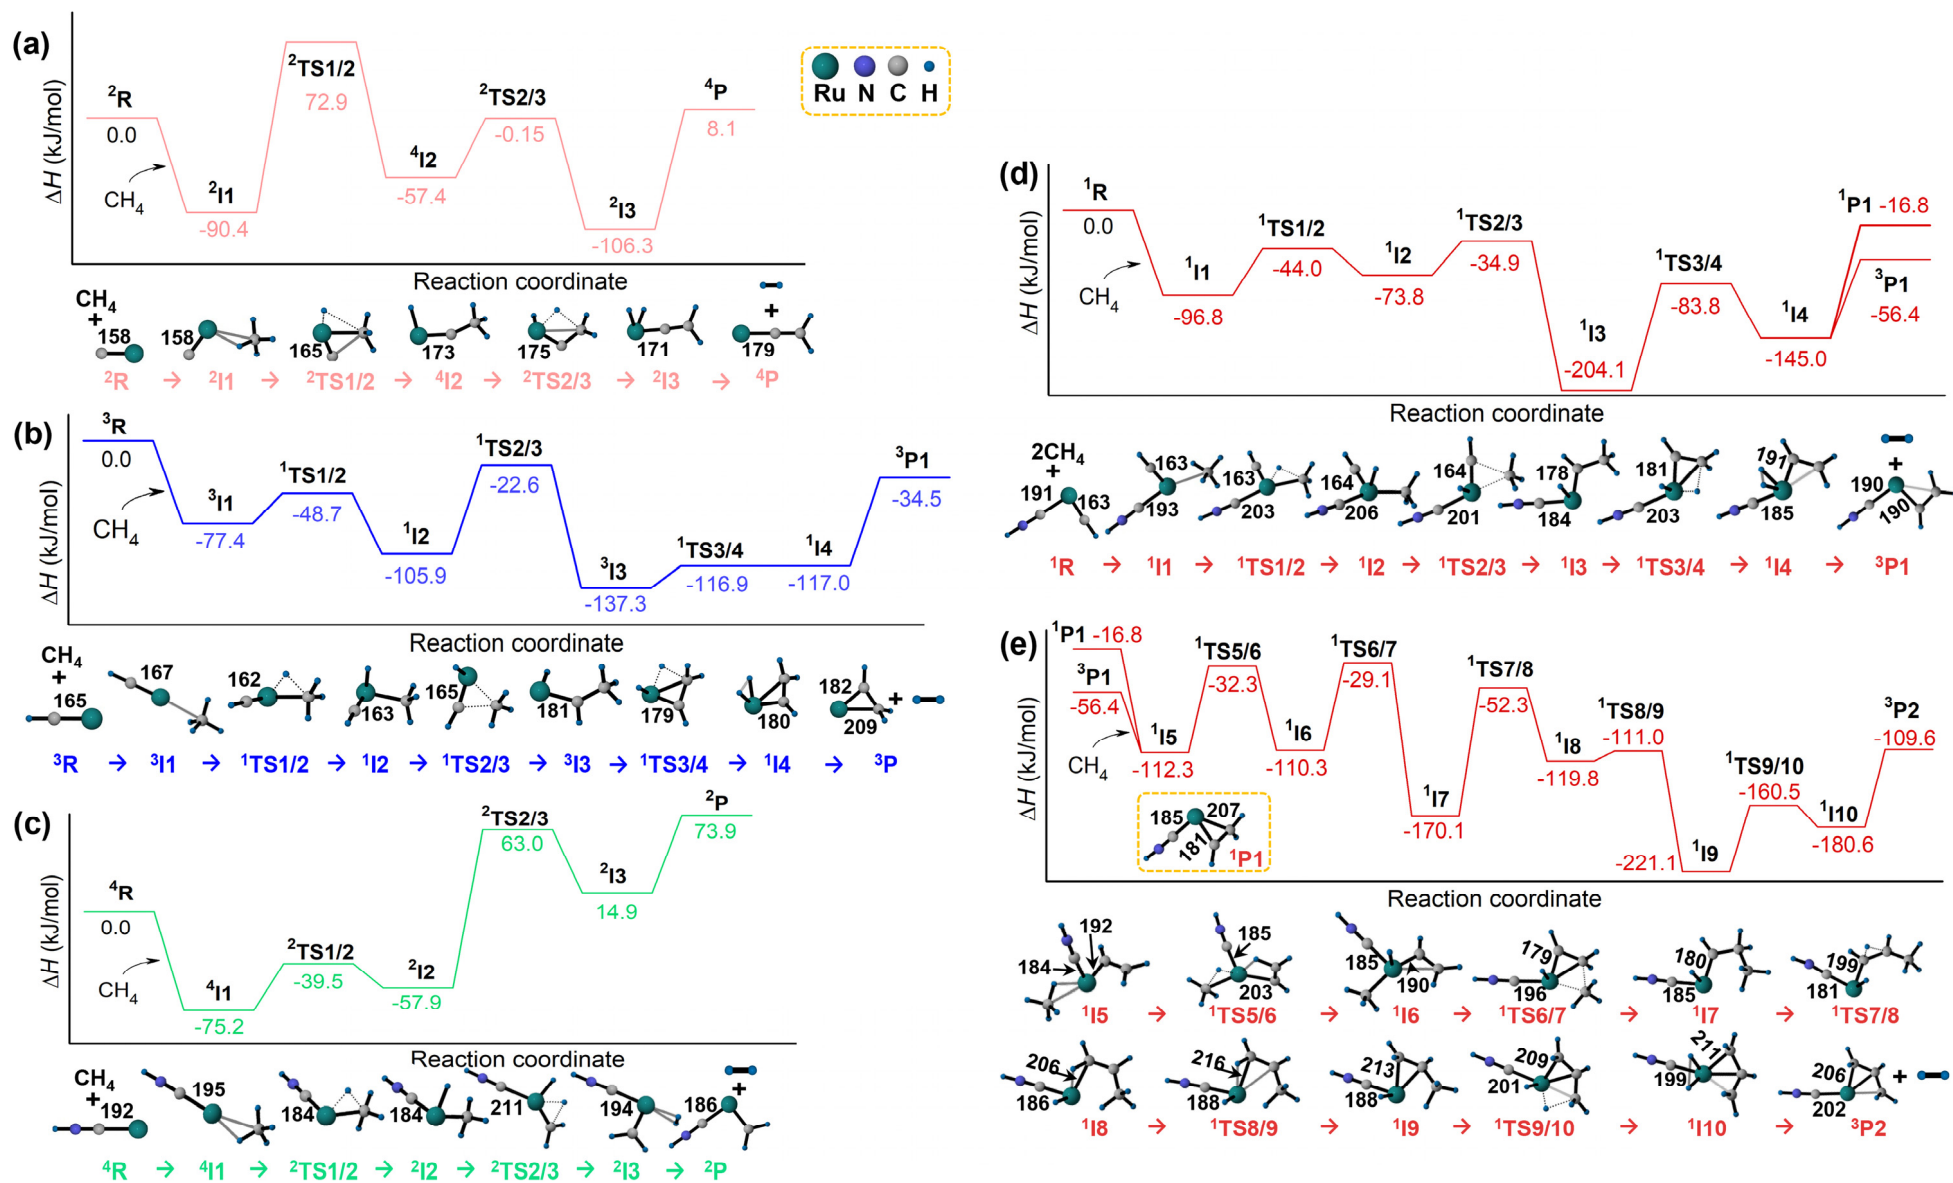

**Fig. S13** PES toward the reactions of  $[\text{RuC}]^+$  (a),  $[\text{RuCH}]^+$  (b),  $[\text{RuCNH}]^+$  (c) and  $[\text{RuCHCNH}]^+$  (d-e) with  $\text{CH}_4$ . Calculations are carried out at PBE0/def2-QZVPP//PBE0/def2-TZVPP level. Energies are in kJ/mol.

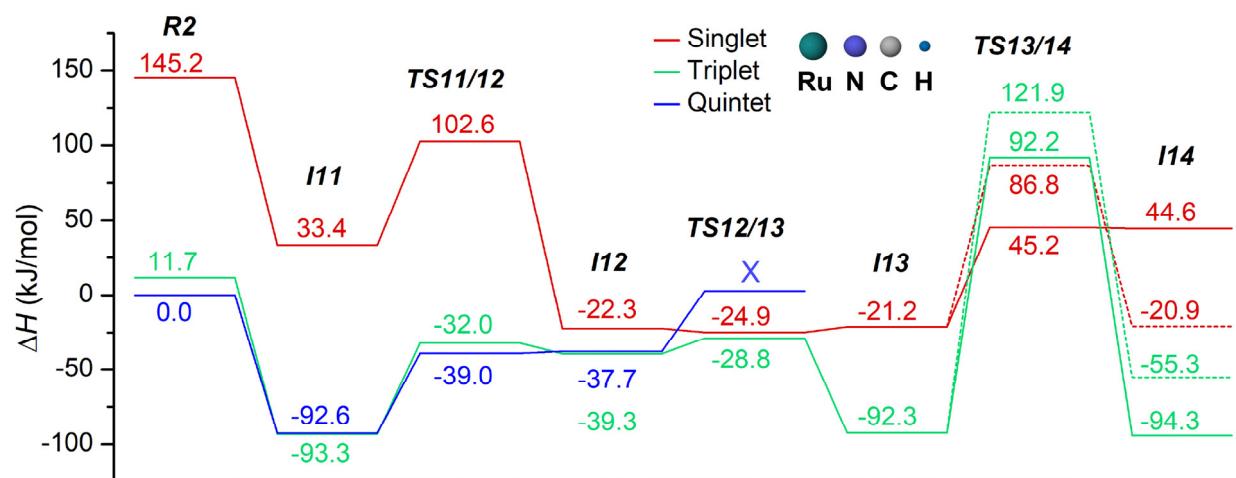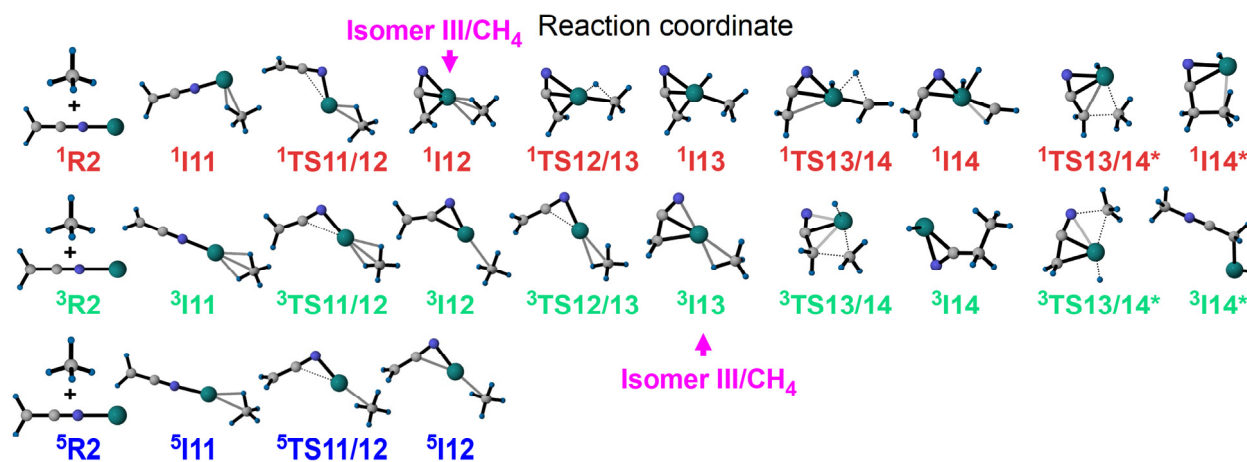

Fig. S14 PES toward the reaction of [RuNCCH<sub>2</sub>]<sup>+</sup> with CH<sub>4</sub>. Energies are in kJ/mol.

The singlet transition state <sup>1</sup>TS12/13 is slightly lower in energy than <sup>1</sup>I12 and <sup>1</sup>I13 because of the the zero-point vibration energy (ZPE) correction.<sup>[1]</sup> However, IRC calculations clearly demonstrate the link between <sup>1</sup>TS12/13 and <sup>1</sup>I13.

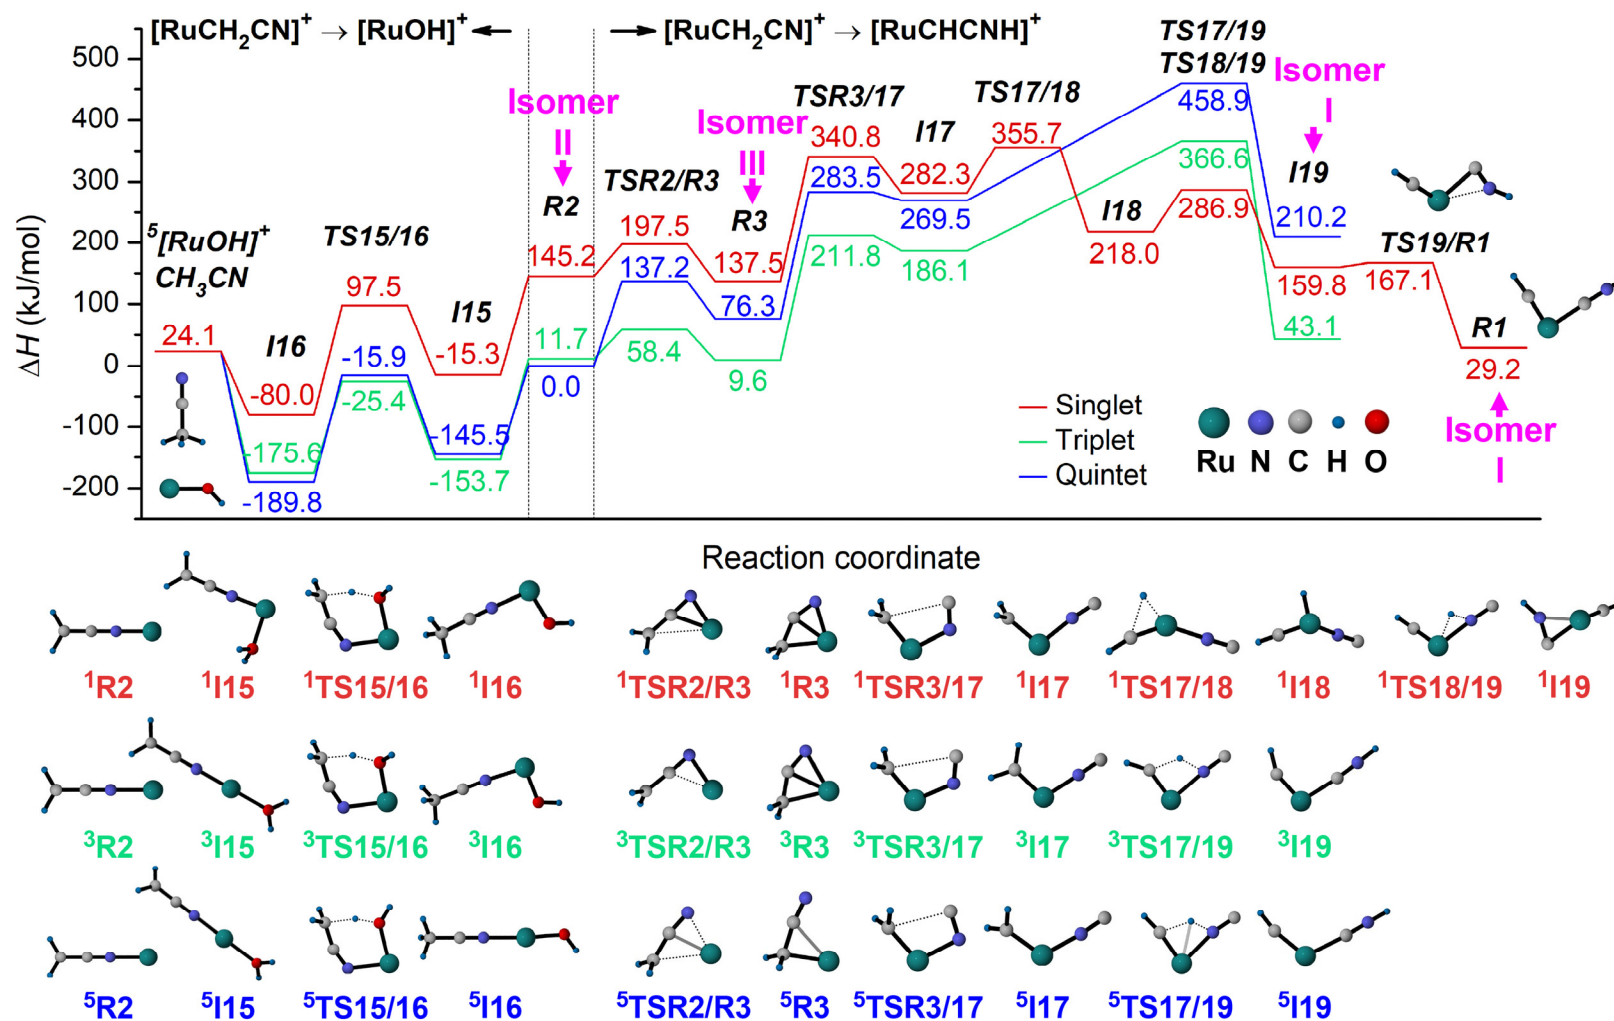

Fig. S15 PES toward the reaction of  $[RuNCCH_2]^+$  with  $H_2O$  and structural transformation between  $[RuNCCH_2]^+$  and  $[RuCHCNH]^+$ . Energies are in kJ/mol.

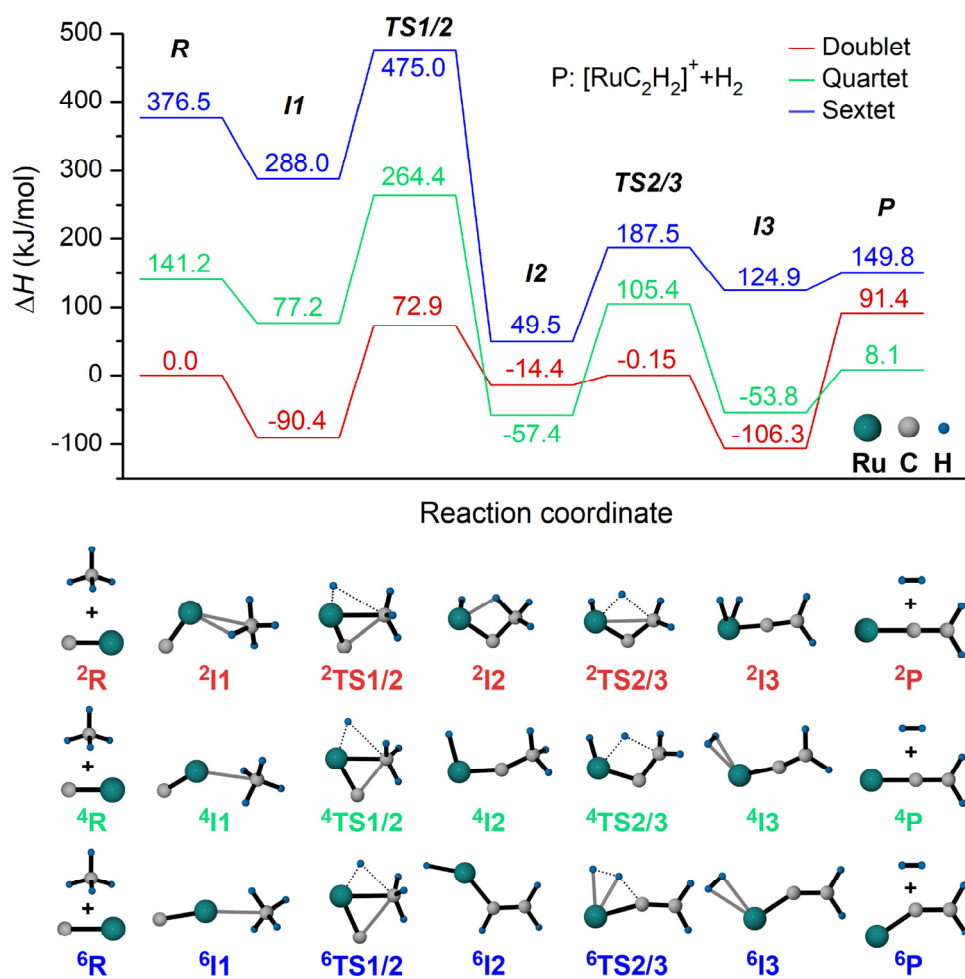

Fig. S16 PES toward the reaction of  $[RuC]^+$  with  $CH_4$ . Energies are in kJ/mol.

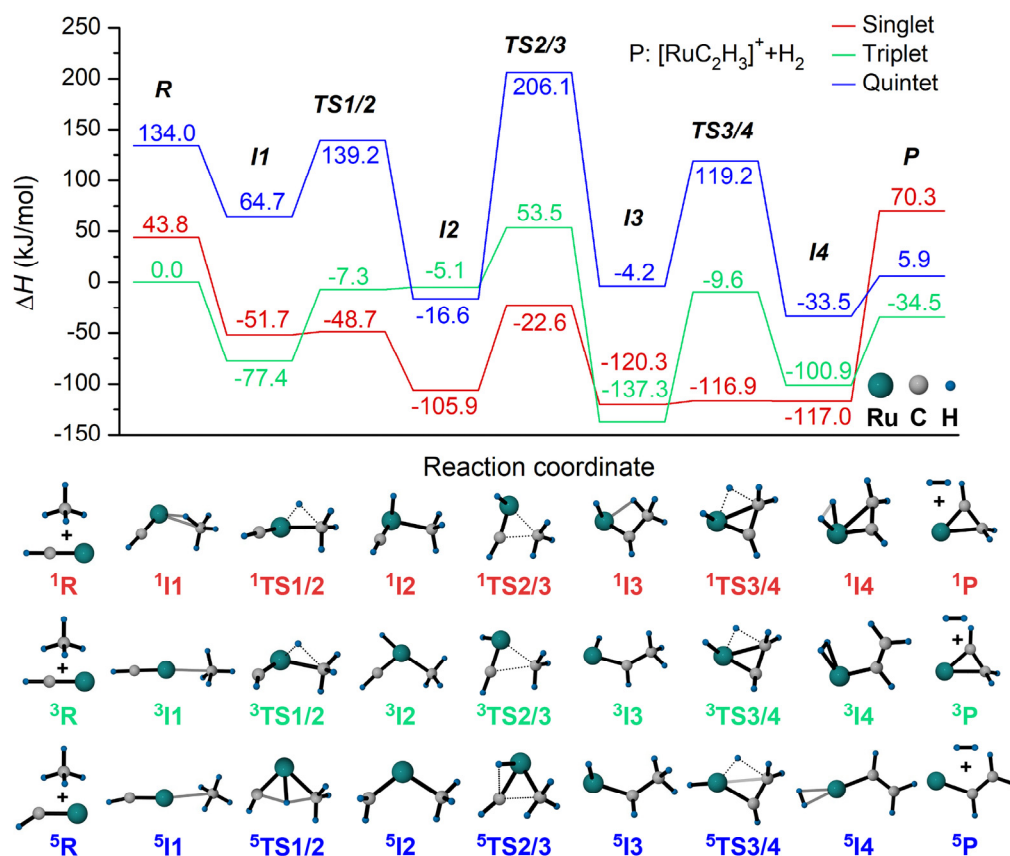

Fig. S17 PES for the reaction of  $[\text{RuCH}]^+$  with  $\text{CH}_4$  toward product P. Energies are in kJ/mol.

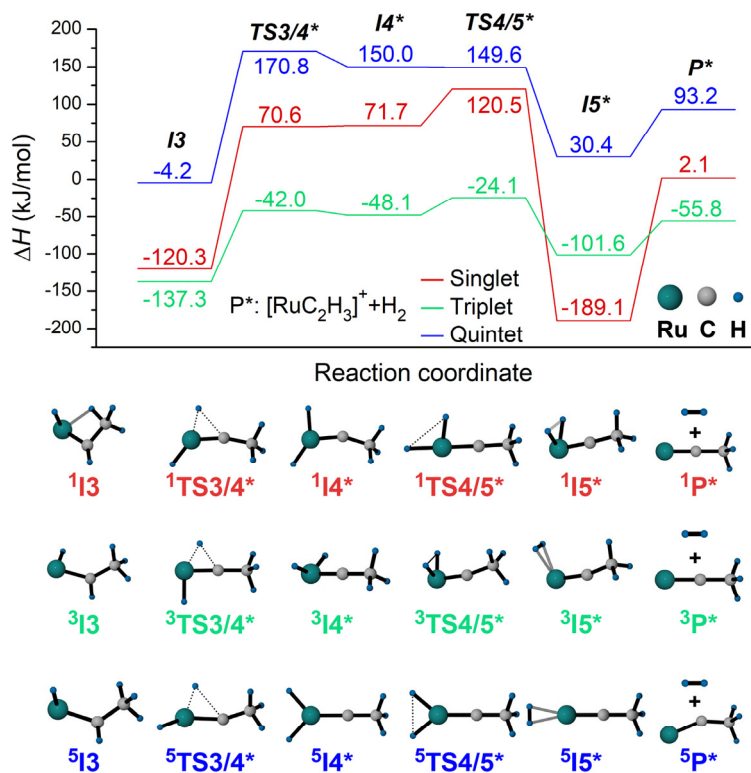

Fig. S18 PES for the reaction of  $[\text{RuCH}]^+$  with  $\text{CH}_4$  toward product P\*. Energies are in kJ/mol.

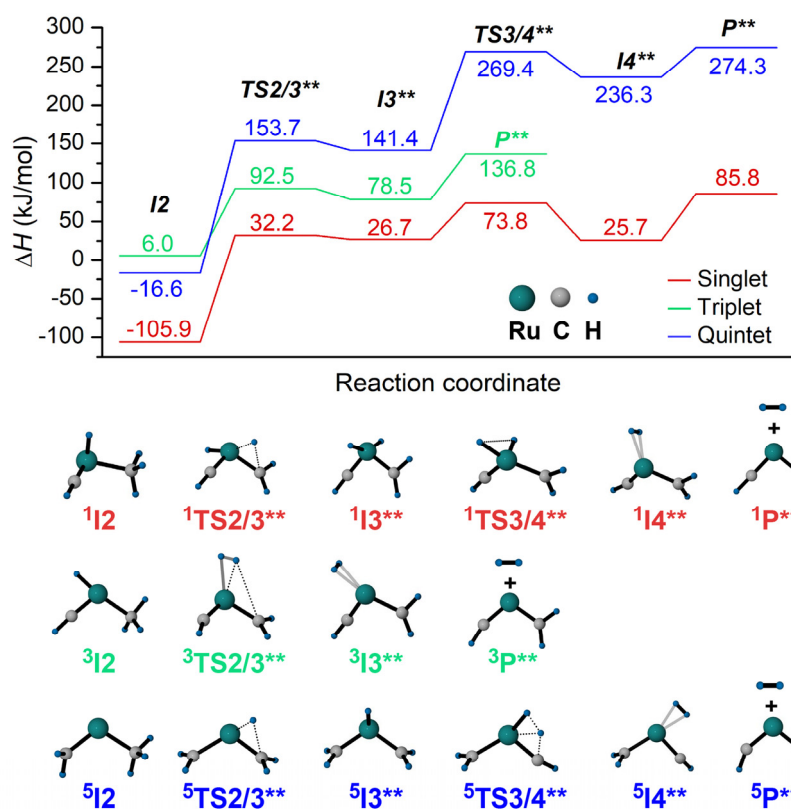

Fig. S19 PES for the reaction of  $[\text{RuCH}]^+$  with  $\text{CH}_4$  toward product  $\text{P}^{**}$ . Energies are in kJ/mol.

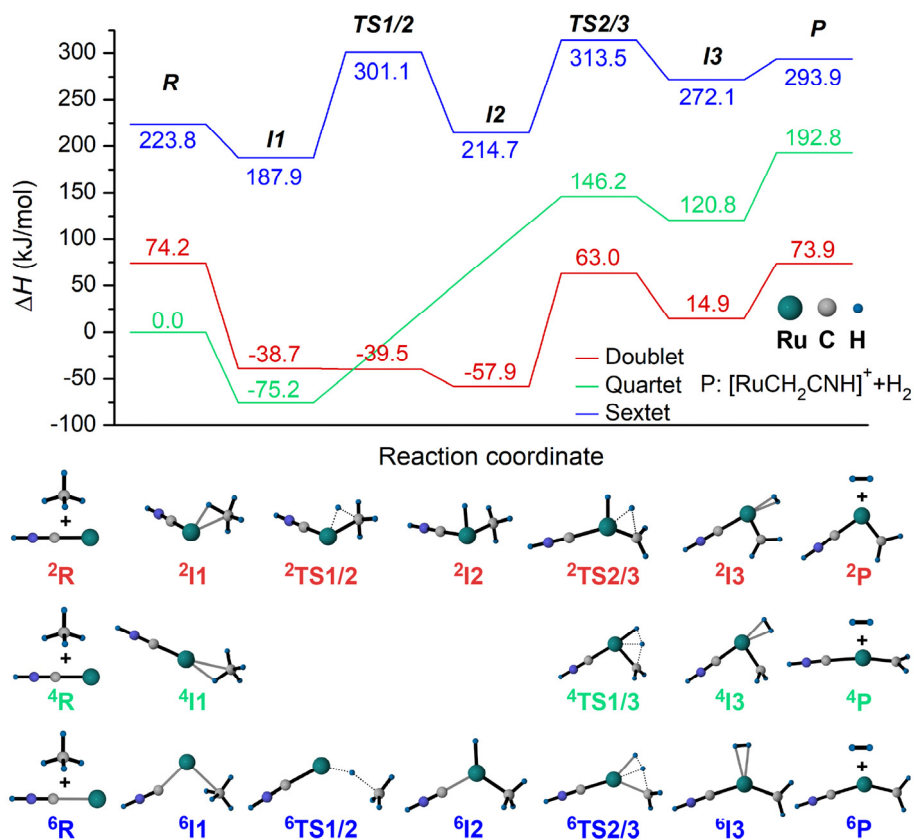

Fig. S20 PES for the reaction of  $[\text{RuCNH}]^+$  with  $\text{CH}_4$ . Energies are in kJ/mol.



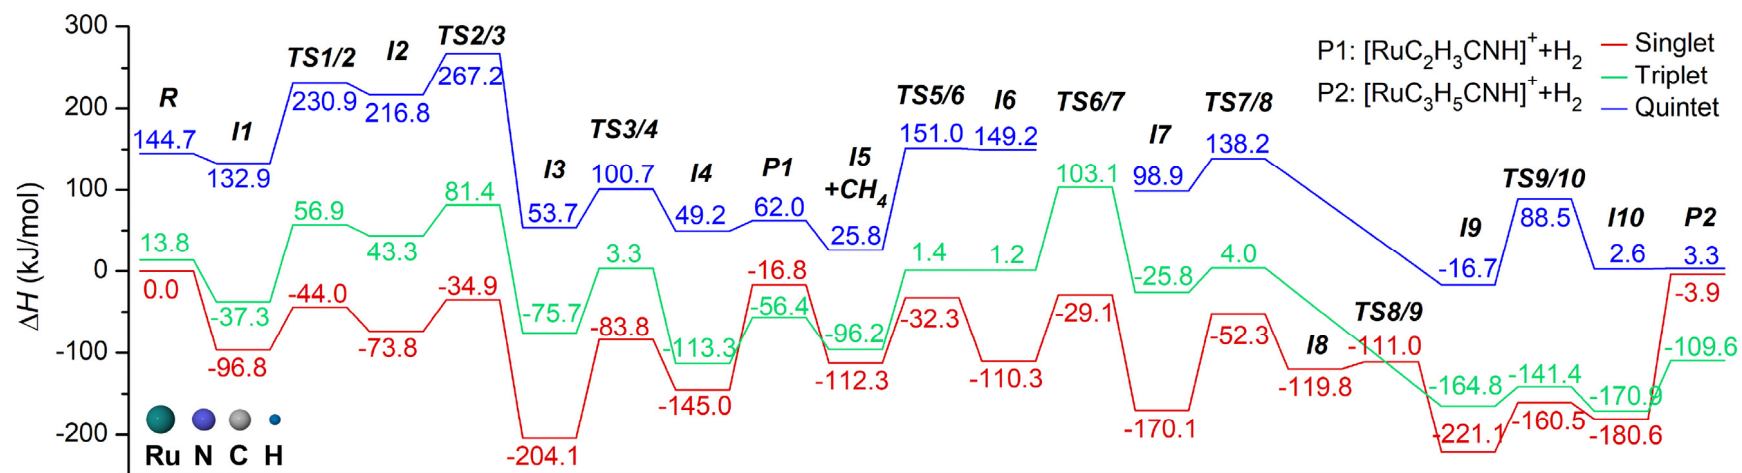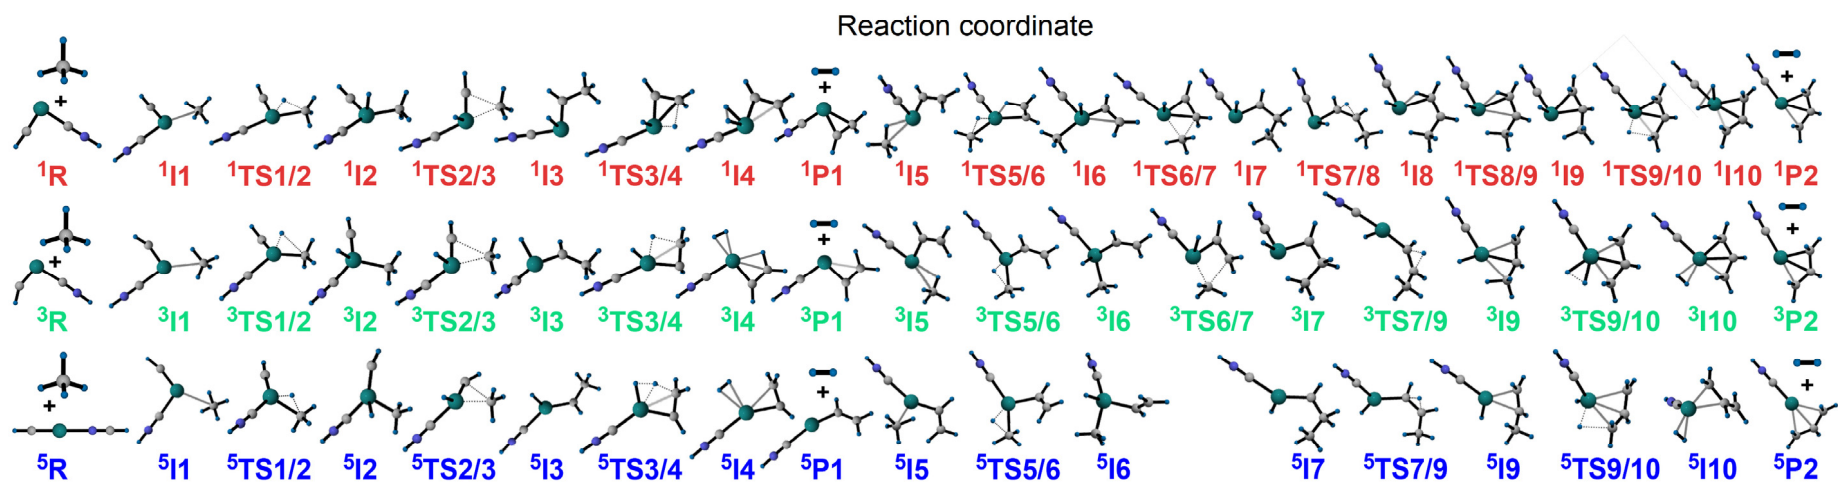

Fig. S21 PES for the reaction of  $[\text{RuCHCNH}]^+$  with  $\text{CH}_4$  toward product P1 and P2. Energies are in kJ/mol.

As shown in Fig. 2b and Fig. S21, the process of CH<sub>4</sub> activation by product **P1** <sup>3</sup>[RuCHCNHCH<sub>2</sub>]<sup>+</sup> ([HNC-Ru-CH-CH<sub>2</sub>]<sup>+</sup>) is similar to that of [RuCHCNH]<sup>+</sup> ([HNC-Ru-CH]<sup>+</sup>). That is, first hydrogen transfer (**TS5/6** → **I6**), C-C bonding (**TS6/7** → **I7**), second hydrogen transfer (**TS9/10** → **I10**) occur in sequence, finally leading to the formation and desorption of H<sub>2</sub>. Also, the charge and spin populations on the transferring hydrogen of singlet <sup>1</sup>**TS5/6** and <sup>1</sup>**TS9/10** are respectively close to 0 and 1 (Fig. S24), proving a HAT process. The only difference is that before the second round of hydrogen transfer to Ru, an alkyl isomerization process (**TS7/8** → **I8**) is needed to lay the groundwork for the generation of exothermic product **P2** [RuCHCNH(CH<sub>2</sub>)<sub>2</sub>]<sup>+</sup> ([HNC-Ru-CH<sub>2</sub>CHCH<sub>2</sub>]<sup>+</sup>). And the direct bonding of CH<sub>3</sub> with CH of [RuCHCNHCH<sub>2</sub>]<sup>+</sup> ([HNC-Ru-CH-CH<sub>2</sub>]<sup>+</sup>) from **I6** to **I8** (or **I9**) is relatively difficult to be achieved due to the larger energy barriers (Fig. S22, **TS6/7\***), further explaining the necessity of alkyl isomerization. It should be pointed out that the relative energies of <sup>1</sup>**TS5/6** (-32.3 kJ/mol), <sup>1</sup>**TS6/7** (-29.1 kJ/mol) and <sup>1</sup>**TS7/8** (-52.3 kJ/mol) are higher than <sup>3</sup>**P1** (-56.4 kJ/mol), indicating the triplet ionic product <sup>3</sup>[RuCHCNHCH<sub>2</sub>]<sup>+</sup> with the lowest energy cannot directly dehydrogenate CH<sub>4</sub> at room temperature. While the spin-conserved pathway with the generation of singlet <sup>1</sup>**P1** (-16.8 kJ/mol, Fig. S21) is more favorable than the TSR process, thus enables the occurrence of second CH<sub>4</sub> activation by [RuCHCNHCH<sub>2</sub>]<sup>+</sup>.

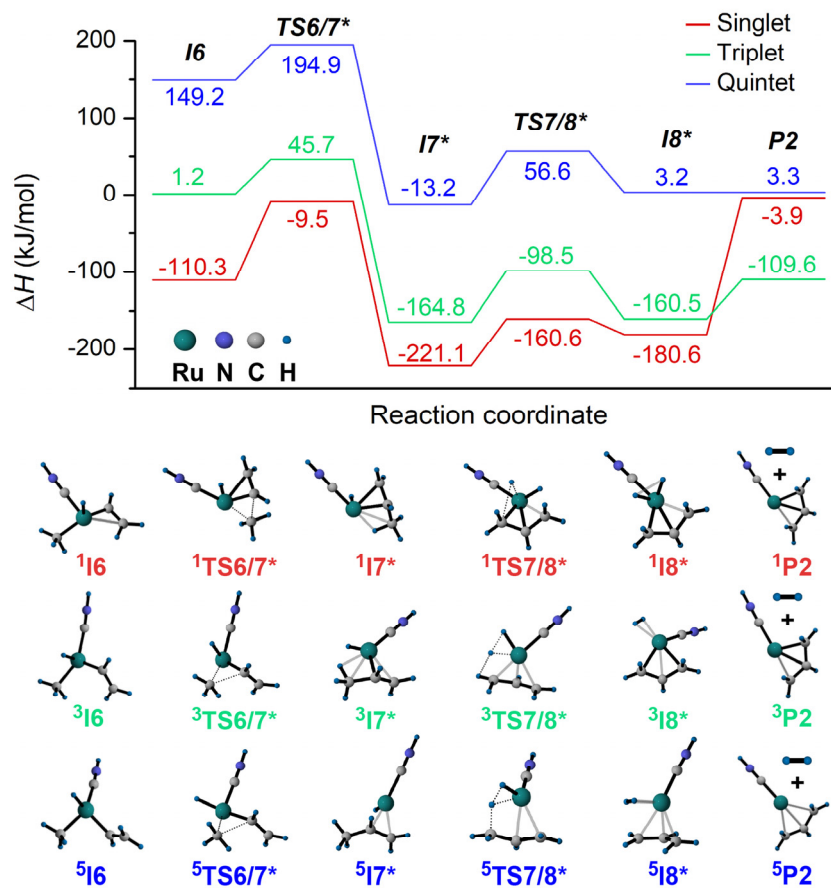

Fig. S22 PES for the reaction of  $[\text{RuCHCNH}]^+$  with  $\text{CH}_4$  toward product  $P_2$ . Energies are in kJ/mol.

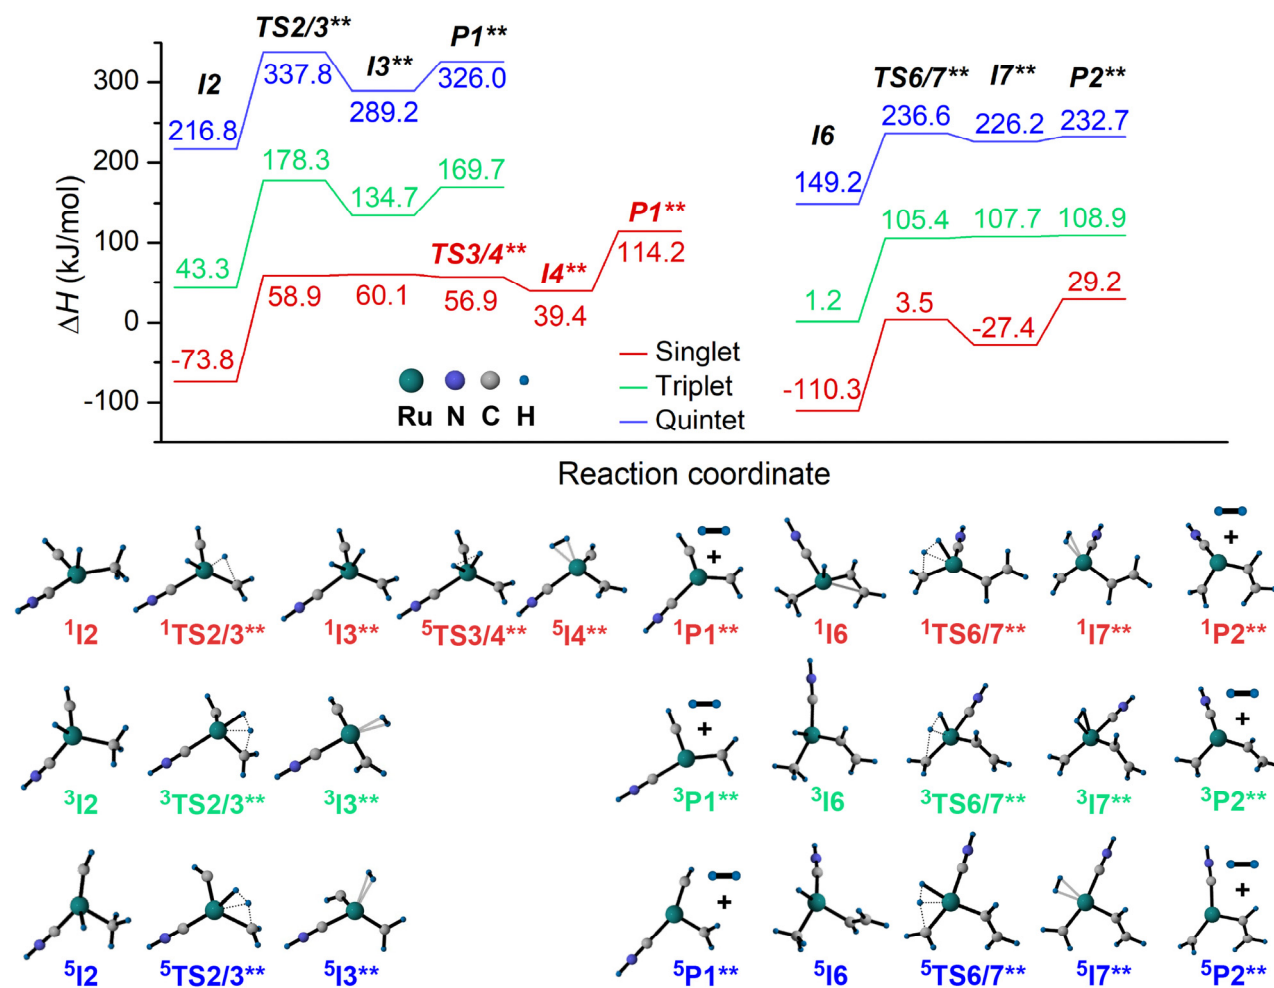

Fig. S23 PES for the reaction of  $[\text{RuCHCNH}]^+$  with  $\text{CH}_4$  toward product  $\text{P}^{**}$ . Energies are in kJ/mol.

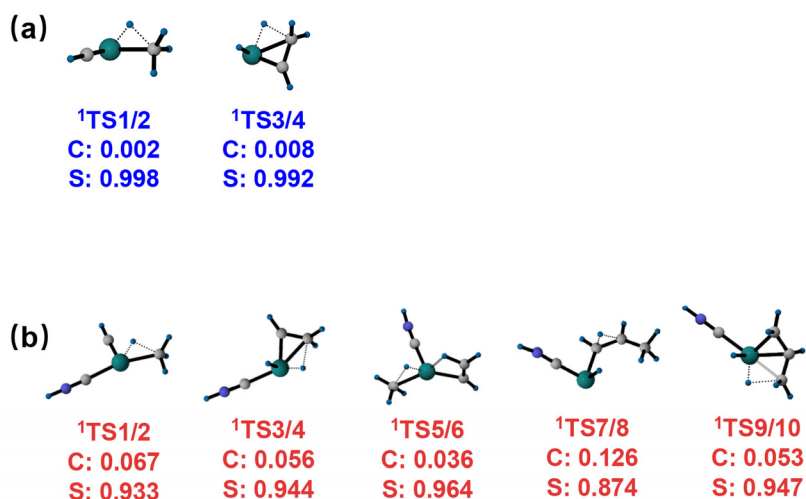

**Fig. S24** Charge and spin populations on the transferring hydrogen of H involved transition states of  $[\text{RuCH}]^+$  and  $[\text{RuCHCNH}]^+$ . Charge population and spin population are abbreviated as “C” and “S”, respectively.

|     |                                                  |                                                   |     |                                                  |                                                   |
|-----|--------------------------------------------------|---------------------------------------------------|-----|--------------------------------------------------|---------------------------------------------------|
| (a) | $^2[\text{RuC}]^+$                               | $^3[\text{RuCH}]^+$                               | (b) | $[\text{RuC}]^+/\text{CH}_4$<br>$^2_1$           | $[\text{RuCH}]^+/\text{CH}_4$<br>$^3_1$           |
|     | Ru                                               | Ru                                                |     | Ru                                               | Ru                                                |
|     | s 0.00                                           | s 0.00                                            |     | s 0.01                                           | s 0.01                                            |
|     | p 0.00                                           | p 0.00                                            |     | p 0.01                                           | p 0.02                                            |
|     | d 100.00                                         | d 99.99                                           |     | d 99.97                                          | d 99.87                                           |
|     | 1.00e                                            | 1.00e                                             |     | 0.99e                                            | 0.99e                                             |
|     |                                                  |                                                   |     |                                                  | 1.00e                                             |
|     |                                                  |                                                   |     |                                                  | 1.00e                                             |
| (c) | $[\text{RuC}]^+/\text{CH}_4$<br>$^2\text{TS1/2}$ | $[\text{RuCH}]^+/\text{CH}_4$<br>$^1\text{TS1/2}$ | (d) | $[\text{RuC}]^+/\text{CH}_4$<br>$^2\text{TS2/3}$ | $[\text{RuCH}]^+/\text{CH}_4$<br>$^1\text{TS3/4}$ |
|     | Ru                                               | Ru                                                |     | 53.8% Ru                                         | 55.35% Ru                                         |
|     | s 0.17                                           | s 0.02                                            |     | s 41.68                                          | s 25.87                                           |
|     | p 0.14                                           | p 0.05                                            |     | p 3.54                                           | p 1.54                                            |
|     | d 99.63                                          | d 99.90                                           |     | d 54.67                                          | d 72.51                                           |
|     | 0.92e                                            | 0.96e                                             |     | 46.2% H                                          | 44.65% C                                          |
|     |                                                  |                                                   |     | s 99.52                                          | s 5.70                                            |
|     |                                                  |                                                   |     | p 0.46                                           | p 93.97                                           |
|     |                                                  |                                                   |     | d 0.02                                           | d 0.31                                            |
|     |                                                  |                                                   |     | 0.83e                                            | 0.40e                                             |
|     |                                                  |                                                   |     |                                                  | 1.65e                                             |

**Fig. 25** Composition and occupancy of alpha and beta HOMOs of (a)  $[\text{RuL}]^+$  (**R**), (b) encounter complexes (**I1**) and transition states involved in the (c) first and (d) second rounds of hydrogen transfer. Red, black and blue numbers display the orbital contribution, subshell composition and electron occupancy.

The hybridized orbitals with significantly decreased electron occupancy give rise to active electron-deficient states, which could be essential for proceeding of HAT processes as mentioned above. This agrees well with the PESs results: i) HOMOs of **R** and **I1** involving  $[\text{RuCH}]^+$  and  $[\text{RuC}]^+$  are both dominated by d orbitals of Ru, thus resulting in inferior difference in the formation of

encounter complex. In contrast, the active involvement of s orbitals of H in transition state for  $[\text{RuCH}]^+/\text{CH}_4$  provides an obvious advantage over  $[\text{RuC}]^+/\text{CH}_4$  during H transfer. ii) After having formed a “H ligand” on Ru (**12**) via the first round of H transfer in  $[\text{RuC}]^+/\text{CH}_4$ , s and p orbitals of H and C contribute to the electron-deficient HOMOs of  $[\text{RuC}]^+/\text{CH}_4$  ( $[\text{H-RuC-CH}_3]^+$ ) in the second round of hydrogen transfer, causing significantly lower (but still hardly feasible) transition states (**TS2/3**, Fig. S13, S16). Thus, although ligand H is not directly involved in orbital formation, here it may have an effect on the composition of HOMOs which determines the accomplishment of  $\text{CH}_4$  dehydrogenation.

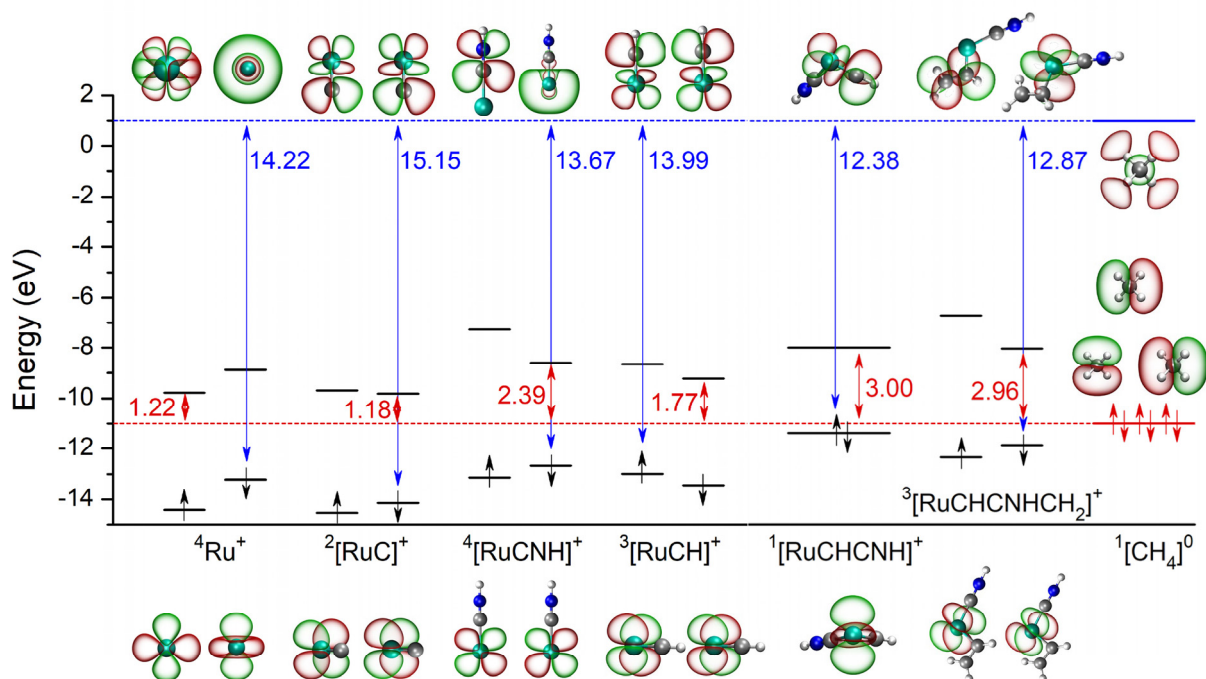

**Fig. S26** HOMOs (bottom) and LUMOs (top) of  $[\text{RuL}]^+$  and  $\text{CH}_4$ .

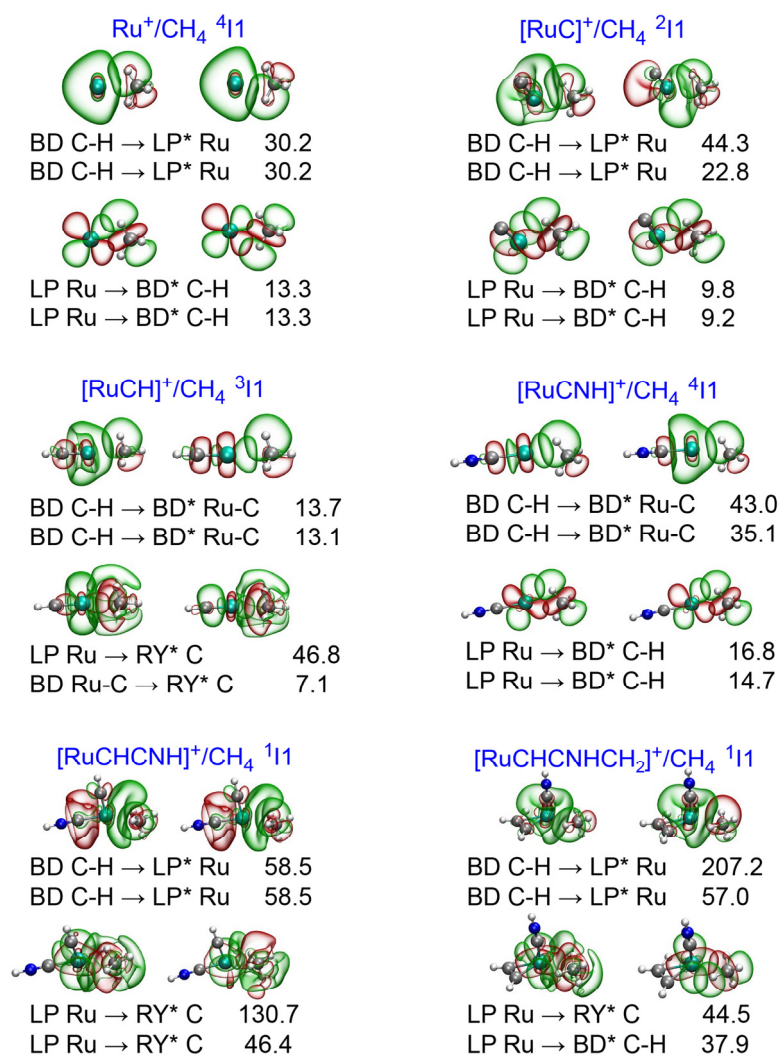

**Fig. S27** Natural bond orbital (NBO) analysis of  $[\text{RuL}]^+/\text{CH}_4$ . Energies are in kJ/mol.

## 2. References

- 1 a) N. Dietl, C. van der Linde, M. Schlangen, M. K. Beyer, H. Schwarz, *Angew. Chem. Int. Ed.* **2011**, *50*, 4966-4969; b) X. N. Wu, Y. X. Zhao, W. Xue, Z. C. Wang, S. G. He, X. L. Ding, *Phys. Chem. Chem. Phys.* **2010**, *12*, 3984-3997; c) S. Feyel, J. Doebler, R. Hoeckendorf, M. K. Beyer, J. Sauer, H. Schwarz, *Angew. Chem. Int. Ed.* **2008**, *47*, 1946-1950.
